# Supplementary material for: A micronutrient supplement modulates homocysteine levels regardless of vitamin B biostatus in elderly subjects
Source: Atypon-hosted journal article supplement (doi:10.1024/0300-9831/a000777), 2023-01-30
Supplement: 0300-9831_a000777_esm1.pdf [file 0300-9831_a000777_esm1.pdf]

## Electronic Supplementary Material 1

**Table E1: Linear regression analysis of Hcy levels and levels of serum cobalamin, Holo-TC, and RBC folate at baseline.**

| Micronutrient status marker | Regression coefficient | <i>p</i>      | Beta <sup>a</sup> |
|-----------------------------|------------------------|---------------|-------------------|
| Serum cobalamin             | -0.001                 | <b>0.039*</b> | -0.180            |
| Holo-TC                     | -0.001                 | <b>0.017*</b> | -0.210            |
| RBC folate                  | -0.001                 | <b>0.411</b>  | -0.074            |

Homocysteine (Hcy), holo-transcobalamin (Holo-TC), red blood cell folate (RBC folate)

All variables in the table were log-transformed due to a non-normal distribution and included in the adjusted models as follows: <sup>1</sup> adjusted for sex, BMI, and serum creatinine. <sup>a</sup> = standardized beta coefficient.
